# Supplementary material
Source: PubMed Central journal article supplement (PMC8459570)
Supplement: NIHMS1733664-supplement-1.pdf [file NIHMS1733664-supplement-1.pdf]

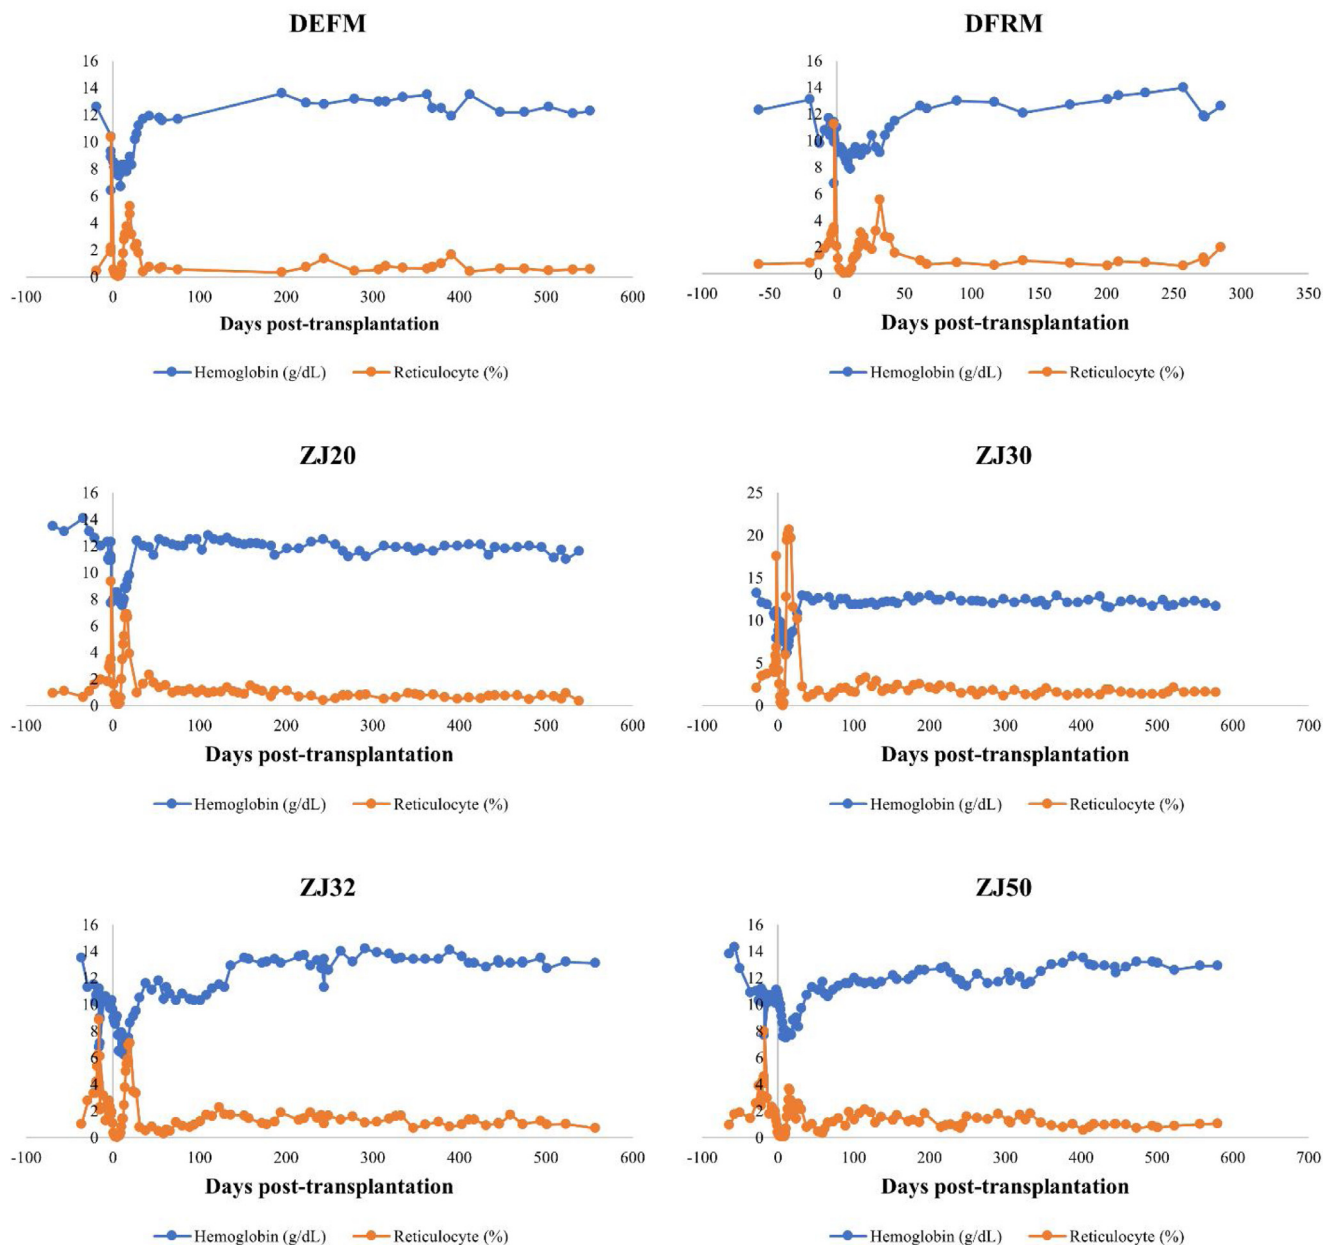

**Supplementary Figure E1.** Hemoglobin (g/dL) and reticulocyte (%) levels in total body irradiated (DEFM, DFRM, ZJ20, and ZJ30) and busulfan conditioned (ZJ32 and ZJ50) rhesus monkeys (*Macaca mulatta*) transplanted with CD34<sup>+</sup> cells.
